# Supplementary material
Source: Springer Nature journal article supplement (https://www.springermedizin.de/resource/supplementary/12885_2013_4033_MOESM2_ESM.pdf/9465066)
Supplement: MOESM2 [file 9465066]

| LCM spec. ID | Subject group | patient # | Subject code | cell type  | bisDNA yield (ng) | Group description            | # of samples averaged in data analysis |
|--------------|---------------|-----------|--------------|------------|-------------------|------------------------------|----------------------------------------|
| 1            | Healthy       | patient 1 | BSM 0451     | Epithelial | 9,82              | Healthy_patient1_epith       | 6                                      |
| 2            | Healthy       | patient 1 | BSM 0451     | Epithelial | 8,45              |                              |                                        |
| 3            | Healthy       | patient 1 | BSM 0451     | Epithelial | 2,37              |                              |                                        |
| 4            | Healthy       | patient 1 | BSM 0451     | Epithelial | 4,32              |                              |                                        |
| 5            | Healthy       | patient 1 | BSM 0451     | Epithelial | 3,25              |                              |                                        |
| 6            | Healthy       | patient 1 | BSM 0451     | Epithelial | 5,92              |                              |                                        |
| 9            | Healthy       | patient 2 | BSM 0452     | Epithelial | 3,49              | Healthy_patient2_epith       | 6                                      |
| 10           | Healthy       | patient 2 | BSM 0452     | Epithelial | 4,42              |                              |                                        |
| 11           | Healthy       | patient 2 | BSM 0452     | Epithelial | 10,69             |                              |                                        |
| 12           | Healthy       | patient 2 | BSM 0452     | Epithelial | 4,03              |                              |                                        |
| 13           | Healthy       | patient 2 | BSM 0452     | Epithelial | 2,24              |                              |                                        |
| 14           | Healthy       | patient 2 | BSM 0452     | Epithelial | 4,38              |                              |                                        |
| 17           | Healthy       | patient 3 | BSM 0453     | Epithelial | 4,24              | Healthy_patient3_epith       | 6                                      |
| 18           | Healthy       | patient 3 | BSM 0453     | Epithelial | 5,82              |                              |                                        |
| 19           | Healthy       | patient 3 | BSM 0453     | Epithelial | 2,98              |                              |                                        |
| 20           | Healthy       | patient 3 | BSM 0453     | Epithelial | 1,20              |                              |                                        |
| 21           | Healthy       | patient 3 | BSM 0453     | Epithelial | 4,00              |                              |                                        |
| 22           | Healthy       | patient 3 | BSM 0453     | Epithelial | 3,17              |                              |                                        |
| 7            | Healthy       | patient 1 | BSM 0451     | Stromal    | 2,30              | Healthy_patient1_strom       | 2                                      |
| 8            | Healthy       | patient 1 | BSM 0451     | Stromal    | 10,23             |                              |                                        |
| 15           | Healthy       | patient 2 | BSM 0452     | Stromal    | 8,46              | Healthy_patient2_strom       | 2                                      |
| 16           | Healthy       | patient 2 | BSM 0452     | Stromal    | 2,11              |                              |                                        |
| 23           | Healthy       | patient 3 | BSM 0453     | Stromal    | 4,06              | Healthy_patient3_strom       | 2                                      |
| 24           | Healthy       | patient 3 | BSM 0453     | Stromal    | 1,89              |                              |                                        |
| 25           | Tumor         | patient 4 | BSM 0454     | Epithelial | 28,58             | Tumor_patient1_epith         | 6                                      |
| 26           | Tumor         | patient 4 | BSM 0454     | Epithelial | 18,75             |                              |                                        |
| 27           | Tumor         | patient 4 | BSM 0454     | Epithelial | 4,22              |                              |                                        |
| 28           | Tumor         | patient 4 | BSM 0454     | Epithelial | 18,83             |                              |                                        |
| 29           | Tumor         | patient 4 | BSM 0454     | Epithelial | 9,03              |                              |                                        |
| 30           | Tumor         | patient 4 | BSM 0454     | Epithelial | 1,38              |                              |                                        |
| 41           | Tumor         | patient 5 | BSM 0455     | Epithelial | 15,58             | Tumor_patient2_epith         | 6                                      |
| 42           | Tumor         | patient 5 | BSM 0455     | Epithelial | 4,93              |                              |                                        |
| 43           | Tumor         | patient 5 | BSM 0455     | Epithelial | 6,08              |                              |                                        |
| 44           | Tumor         | patient 5 | BSM 0455     | Epithelial | 5,25              |                              |                                        |
| 45           | Tumor         | patient 5 | BSM 0455     | Epithelial | 7,30              |                              |                                        |
| 46           | Tumor         | patient 5 | BSM 0455     | Epithelial | 17,25             |                              |                                        |
| 57           | Tumor         | patient 6 | BSM 0456     | Epithelial | 1,06              | Tumor_patient3_epith         | 6                                      |
| 58           | Tumor         | patient 6 | BSM 0456     | Epithelial | 0,61              |                              |                                        |
| 59           | Tumor         | patient 6 | BSM 0456     | Epithelial | 1,28              |                              |                                        |
| 60           | Tumor         | patient 6 | BSM 0456     | Epithelial | 1,47              |                              |                                        |
| 61           | Tumor         | patient 6 | BSM 0456     | Epithelial | 7,17              |                              |                                        |
| 62           | Tumor         | patient 6 | BSM 0456     | Epithelial | 12,58             |                              |                                        |
| 31           | Tumor         | patient 4 | BSM 0454     | Stromal    | 23,01             | Tumor_patient1_strom         | 2                                      |
| 32           | Tumor         | patient 4 | BSM 0454     | Stromal    | 25,22             |                              |                                        |
| 47           | Tumor         | patient 5 | BSM 0455     | Stromal    | 11,08             | Tumor_patient2_strom         | 2                                      |
| 48           | Tumor         | patient 5 | BSM 0455     | Stromal    | 2,50              |                              |                                        |
| 63           | Tumor         | patient 6 | BSM 0456     | Stromal    | 15,81             | Tumor_patient3_strom         | 2                                      |
| 64           | Tumor         | patient 6 | BSM 0456     | Stromal    | 4,35              |                              |                                        |
| 33           | NAT1          | patient 4 | BSM 0454     | Epithelial | 1,96              | NAT_patient1_distance1_epith | 3                                      |
| 34           | NAT1          | patient 4 | BSM 0454     | Epithelial | 10,82             |                              |                                        |
| 35           | NAT1          | patient 4 | BSM 0454     | Epithelial | 22,85             |                              |                                        |
| 49           | NAT1          | patient 5 | BSM 0455     | Epithelial | 2,34              | NAT_patient2_distance1_epith | 3                                      |
| 50           | NAT1          | patient 5 | BSM 0455     | Epithelial | 7,89              |                              |                                        |
| 51           | NAT1          | patient 5 | BSM 0455     | Epithelial | 1,46              |                              |                                        |
| 65           | NAT1          | patient 6 | BSM 0456     | Epithelial | 6,11              | NAT_patient3_distance1_epith | 3                                      |
| 66           | NAT1          | patient 6 | BSM 0456     | Epithelial | 1,34              |                              |                                        |
| 67           | NAT1          | patient 6 | BSM 0456     | Epithelial | 2,08              |                              |                                        |
| 36           | NAT1          | patient 4 | BSM 0454     | Stromal    | 8,00              | NAT_patient1_distance1_strom | 1                                      |
| 52           | NAT1          | patient 5 | BSM 0455     | Stromal    | 6,21              | NAT_patient2_distance1_strom | 1                                      |
| 68           | NAT1          | patient 6 | BSM 0456     | Stromal    | 1,72              | NAT_patient3_distance1_strom | 1                                      |

|    |         |           |          |            |       |                              |   |
|----|---------|-----------|----------|------------|-------|------------------------------|---|
| 37 | NAT2    | patient 4 | BSM 0454 | Epithelial | 9,82  | NAT_patient1_distance2_epith | 3 |
| 38 | NAT2    | patient 4 | BSM 0454 | Epithelial | 2,86  |                              |   |
| 39 | NAT2    | patient 4 | BSM 0454 | Epithelial | 2,30  |                              |   |
| 53 | NAT2    | patient 5 | BSM 0455 | Epithelial | 3,97  | NAT_patient2_distance2_epith | 3 |
| 54 | NAT2    | patient 5 | BSM 0455 | Epithelial | 25,15 |                              |   |
| 55 | NAT2    | patient 5 | BSM 0455 | Epithelial | 0,94  |                              |   |
| 69 | NAT2    | patient 6 | BSM 0456 | Epithelial | 7,49  | NAT_patient3_distance2_epith | 3 |
| 70 | NAT2    | patient 6 | BSM 0456 | Epithelial | 0,10  |                              |   |
| 71 | NAT2    | patient 6 | BSM 0456 | Epithelial | 14,75 |                              |   |
| 40 | NAT2    | patient 4 | BSM 0454 | Stromal    | 5,90  | NAT_patient1_distance2_strom | 1 |
| 56 | NAT2    | patient 5 | BSM 0455 | Stromal    | 11,36 | NAT_patient2_distance2_strom | 1 |
| 72 | NAT2    | patient 6 | BSM 0456 | Stromal    | 2,47  | NAT_patient3_distance2_strom | 1 |
| 73 | Adenoma | patient 7 | BSM 0457 | Epithelial | 24,29 | Polyp_patient1_epith         | 6 |
| 74 | Adenoma | patient 7 | BSM 0457 | Epithelial | 4,19  |                              |   |
| 75 | Adenoma | patient 7 | BSM 0457 | Epithelial | 6,34  |                              |   |
| 76 | Adenoma | patient 7 | BSM 0457 | Epithelial | 16,40 |                              |   |
| 77 | Adenoma | patient 7 | BSM 0457 | Epithelial | 6,52  |                              |   |
| 78 | Adenoma | patient 7 | BSM 0457 | Epithelial | 0,72  |                              |   |
| 81 | Adenoma | patient 8 | BSM 0458 | Epithelial | 2,21  | Polyp_patient2_epith         | 6 |
| 82 | Adenoma | patient 8 | BSM 0458 | Epithelial | 16,10 |                              |   |
| 83 | Adenoma | patient 8 | BSM 0458 | Epithelial | 3,39  |                              |   |
| 84 | Adenoma | patient 8 | BSM 0458 | Epithelial | 9,89  |                              |   |
| 85 | Adenoma | patient 8 | BSM 0458 | Epithelial | 12,86 |                              |   |
| 86 | Adenoma | patient 8 | BSM 0458 | Epithelial | 4,61  |                              |   |
| 89 | Adenoma | patient 4 | BSM 0454 | Epithelial | 3,97  | Polyp_patient3_epith         | 6 |
| 90 | Adenoma | patient 4 | BSM 0454 | Epithelial | 19,23 |                              |   |
| 91 | Adenoma | patient 4 | BSM 0454 | Epithelial | 13,98 |                              |   |
| 92 | Adenoma | patient 4 | BSM 0454 | Epithelial | 2,97  |                              |   |
| 93 | Adenoma | patient 4 | BSM 0454 | Epithelial | 19,04 |                              |   |
| 94 | Adenoma | patient 4 | BSM 0454 | Epithelial | 21,54 |                              |   |
| 79 | Adenoma | patient 7 | BSM 0457 | Stromal    | 3,52  | Polyp_patient1_strom         | 2 |
| 80 | Adenoma | patient 7 | BSM 0457 | Stromal    | 22,48 |                              |   |
| 87 | Adenoma | patient 8 | BSM 0458 | Stromal    | 12,00 | Polyp_patient2_strom         | 2 |
| 88 | Adenoma | patient 8 | BSM 0458 | Stromal    | 1,61  |                              |   |
| 95 | Adenoma | patient 4 | BSM 0454 | Stromal    | 12,00 | Polyp_patient3_strom         | 2 |
| 96 | Adenoma | patient 4 | BSM 0454 | Stromal    | 5,62  |                              |   |
